# Supplementary material
Source: Research Square preprint supplement (doi:10.21203/rs.3.rs-9869431/v1)
Supplement: Supplementary file 1 [file f427992a0db854d3bd99f89c.xlsx]

## Sheet:  Table S1
	Table S1. Reactive for TYI-S-33 culture medium
	Reactive	Concentration
		M
	Glucose	0.0555074
	Sodium chloride	0.0342231
	L-Cysteine	0.00825355
	Ascorbic acid	0.00113559
	Monobasic potasium phosphate	0.00440885
	Dibasic potassium phosphate	0.00574119
	Ferric ammonium citrate	0.000113208
	Bovine bile	1.0 g
	Yeast extract	10 g
	Trypticase	20 g
	Fetal bovine serum	0.1
	Fill with deionized water	1000 mL

## Sheet: Table S2 
	Table S2. Three tests for triplicate performed with 58.4 mM of MTZ in TYI-S-33 with and without trophozoites and with PBS
	Condition	TYI-S-33 + MTZ (58.42 mM) + Trophozoites (500,000)
	Minutes	15	60	120	180	240
	Concentration	mM	mM	mM	mM	mM
	Assays 1	9.9	7.6	4.1	2.3	1.2
	2	9.9	5.8	2.9	2.9	0.6
	3	13.4	10.5	8.2	3.5	2.3
	4	17.5	11.1	2.9	5.2	2.9
	5	13.4	9.9	3.5	1.2	1.2
	6	12.2	6.4	1.2	1.2	0.6
	7	23.4	16.3	9.9	5.8	1.7
	8	20.4	12.9	5.8	3.5	5.2
	9	19.8	12.2	3.5	2.9	2.3
	Average	15.54	10.3	4.67	3.17	2
	E.D	4.89	3.35	2.79	1.58	1.44
	Condition	TYI-S-33 + MTZ (58.42 mM)
	Minutes	15	60	120	180	240
	Concentration	mM	mM	mM	mM	mM
	Assays 1	23.4	14	6.4	4.7	2.3
	2	25.1	16.9	6.4	5.2	2.3
	3	26.3	15.8	3.5	3.5	0.6
	4	26.9	8.8	7.6	4.7	3.5
	5	8.8	6.4	4.1	3.5	1.7
	6	5.8	4.1	2.3	1.7	1.2
	7	34.4	25.7	8.8	7.6	2.9
	8	23.4	16.9	6.4	4.1	4.1
	9	29.2	18.7	10.5	7	2.3
	Average	22.59	14.14	6.22	4.67	2.32
	E.D	9.32	6.72	2.6	1.81	1.09
	Condition	PBS + MTZ (58.42 mM)
	Minutes	15	60	120	180	240
	Concentration	mM	mM	mM	mM	mM
	Assays 1	62.5	57.8	57.8	58.4	60.7
	2	62.5	59	59	63.1	62
	3	61.3	63.6	63.1	63.1	60.1
	4	59	58.4	62.5	59	57.8
	5	58.4	62.5	59.6	60.1	60.7
	6	59	60.7	59	59.6	61.3
	7	59.6	57.8	60.1	58.4	61.3
	8	61.3	55.5	59	56.6	59.6
	9	58.4	59.6	59.6	62.5	61.3
	Average	60.22	59.43	59.97	60.09	60.53
	E.D	1.69	2.51	1.73	2.33	1.25
	E.D: Standard deviation

## Sheet: Table S3
	Table S3. Assays of TYI-S-33 reagents performed with 58.42 mM of MTZ
	Condition	Cysteine
	Minutes	15	60	120	180	240
	Concentration	mM	mM	mM	mM	mM
	Assays 1	63.66	58.98	60.15	61.32	60.15
	2	62.49	61.32	60.74	61.32	61.9
	3	61.32	61.32	60.74	61.32	60.74
	4	55.48	57.23	56.06	54.9	55.48
	5	54.31	57.23	56.06	56.65	54.9
	6	57.82	56.06	56.06	56.65	54.9
	7	59.57	58.4	56.65	56.65	57.82
	8	60.74	56.65	57.82	54.31	59.57
	9	59.57	55.48	58.4	59.57	54.31
	Average	59.44	58.08	58.08	58.08	57.75
	E. D	3.1	2.13	2.03	2.83	2.93
	Condition	Ascorbic acid
	Minutes	15	60	120	180	240
	Concentration	mM	mM	mM	mM	mM
	Assays 1	53.73	55.48	57.82	58.98	59.57
	2	53.73	53.73	57.82	56.06	60.15
	3	53.73	53.73	56.06	57.82	58.4
	4	58.4	53.14	52.56	56.65	56.65
	5	56.06	54.31	53.14	58.98	56.06
	6	56.06	54.31	52.56	56.65	56.65
	7	55.48	52.56	56.65	55.48	53.73
	8	53.14	54.9	54.31	55.48	53.14
	9	53.14	52.56	55.48	54.31	52.56
	Average	54.83	53.86	55.16	56.71	56.32
	E. D	1.79	1	2.11	1.61	2.76
	Condition	Yeast extract
	Minutes	15	60	120	180	240
	Concentration	mM	mM	mM	mM	mM
	Assays 1	35.04	31.54	25.7	27.45	31.54
	2	39.71	30.95	31.54	27.45	31.54
	3	39.13	26.86	26.28	31.54	31.54
	4	28.62	25.11	25.7	25.7	28.03
	5	29.78	29.2	28.03	27.45	25.7
	6	32.12	28.62	25.7	28.03	25.7
	7	23.36	23.94	24.53	23.94	22.19
	8	21.02	23.94	19.27	24.53	22.78
	9	23.94	21.02	23.94	28.03	21.61
	Average	30.3	26.8	25.63	27.12	26.73
	E. D	6.8	3.56	3.27	2.25	4.12
	Condition	Fetal bovine serum
	Minutes	15	60	120	180	240
	Concentration	mM	mM	mM	mM	mM
	Assays 1	47.3	45.55	44.97	46.72	43.22
	2	47.3	47.3	46.72	46.14	44.38
	3	46.72	47.3	44.38	46.14	43.8
	4	40.3	41.46	44.97	44.97	42.63
	5	39.71	42.63	44.38	45.55	43.22
	6	39.71	44.38	43.22	40.88	41.46
	7	46.14	42.63	47.3	48.47	47.3
	8	43.22	46.14	47.3	45.55	44.97
	9	43.22	43.22	50.22	46.72	44.97
	Average	43.74	44.51	45.94	45.68	43.99
	E. D	3.26	2.16	2.15	2.06	1.68
	Condition	Ferric ammonium citrate
	Minutes	15	60	120	180	240
	Concentration	mM	mM	mM	mM	mM
	Assays 1	36.21	36.21	36.21	36.79	36.79
	2	36.21	36.21	36.79	36.21	36.21
	3	36.79	36.79	36.21	36.21	36.21
	4	40.88	41.46	42.05	42.63	42.63
	5	40.88	41.46	42.63	41.46	42.05
	6	40.88	42.05	42.63	42.63	42.05
	7	40.88	40.88	40.3	40.88	40.88
	8	40.3	40.3	39.13	40.88	40.3
	9	40.88	41.46	39.71	41.46	39.71
	Average	39.32	39.65	39.52	39.91	39.65
	E. D	2.2	2.49	2.64	2.71	2.6
	E.D: Standard deviation

## Sheet: Table S4
		Table S4. Mixture of reagent TYI-S-33 with 58.42 mM of MTZ
		Condition	Ferric ammonium citrate + Cysteine
		Minutes	15	60	120	180	240
		Concentration	mM	mM	mM	mM	mM
		Assays 1	30.37	30.95	29.78	29.78	29.78
		2	30.37	30.95	29.78	29.78	30.37
		3	30.37	31.54	30.37	29.78	30.37
		4	44.38	44.38	44.38	42.63	39.71
		5	44.97	43.8	45.55	44.97	40.3
		6	45.55	43.8	44.97	43.8	42.05
		7	28.62	29.2	28.03	29.2	28.62
		8	28.62	28.03	28.62	28.62	28.62
		9	29.2	29.78	29.2	29.78	28.62
		Average	34.72	34.72	34.52	34.26	33.16
		E.D	7.73	7.04	7.87	7.19	5.72
		Condition	Ferric ammonium citrate + Ascorbic acid
		Minutes	15	60	120	180	240
		Concentration	mM	mM	mM	mM	mM
		Assays 1	37.38	36.79	36.21	36.79	36.21
		2	35.62	37.38	36.79	37.96	36.79
		3	36.79	37.38	36.79	36.79	36.79
		4	35.04	36.79	37.38	37.38	36.79
		5	34.46	36.79	37.38	36.79	36.21
		6	34.46	36.79	36.21	36.79	36.21
		7	34.46	34.46	37.38	37.96	35.62
		8	35.62	37.38	38.54	37.38	35.62
		9	36.79	37.38	39.71	36.21	33.87
		Average	35.62	36.79	37.38	37.12	36.01
		E.D	1.13	0.92	1.13	0.59	0.92
		Condition	Ferric ammonium citrate + Yeast extract
		Minutes	15	60	120	180	240
		Concentration	mM	mM	mM	mM	mM
		Assays 1	31.54	28.03	27.45	24.53	28.03
		2	30.95	23.94	28.03	28.03	24.53
		3	28.03	27.45	23.94	28.03	28.03
		4	30.37	33.29	26.28	30.37	30.37
		5	26.86	32.7	26.86	26.86	29.78
		6	30.37	30.37	26.86	30.37	29.78
		7	23.94	23.94	21.02	24.53	21.02
		8	23.94	21.02	21.61	21.61	21.61
		9	23.36	21.02	24.53	21.61	21.61
		Average	27.71	26.86	25.18	26.22	26.09
		E.D	3.31	4.67	2.55	3.35	3.9
		Condition	Ferric ammonium citrate + Cysteine + Ascorbic acid + Yeast extract
		Minutes	15	60	120	180	240
		Concentration	mM	mM	mM	mM	mM
		Assays 1	36.2	32.7	32.1	32.7	33.2
		2	35.6	35	35	35	33.2
		3	32.7	32.7	32.1	32.7	32.1
		4	33.8	33.2	29.2	33.2	33.2
		5	33.8	33.2	33.2	33.2	32.7
		6	36.7	29.7	32.1	29.2	28.6
		7	39.1	36.7	39.1	37.3	39.1
		8	39.1	34.4	39.1	39.1	41.4
		9	42	34.4	39.1	39.1	38.5
		Average	36.56	33.56	34.56	34.61	34.67
		E.D	3.04	1.94	3.72	3.32	4.08
		E.D: Standard deviation

## Sheet: Figure S1 
		Figure S1. Chromatogram of TYI-S-33 culture medium and Metronidazole
		The concentrations of metronidazole (MTZ) were: 58.42, 116.84, 350.52, 584.20, 817.88, and 1168.40 mM.
		The retention times observed for the TYI-S-33 culture medium were 1.6, 1.8, and 3 minutes, while the retention time for MTZ was 3.8 minutes.

## Sheet: Table S5
	Table S5. Assays performed with 584.24 mM of MTZ in TYI-S-33 with and without trophozoites, and with PBS
	Condition	TYI-S-33 + MTZ (584.24 mM) + Trophozoites (500,000)
	Minutes	15	60	120	180	240
	Concentration	mM	mM	mM	mM	mM
	Assays 1	269.33	124.44	84.71	66.02	30.38
	2	301.47	126.78	80.04	56.67	30.38
	3	292.7	126.2	81.21	53.75	46.15
	4	321.92	179.95	150.73	106.33	87.05
	5	303.8	181.7	130.29	84.71	77.12
	6	342.95	178.78	129.7	93.48	67.19
	7	283.36	155.99	111.01	93.48	49.08
	8	301.47	174.1	96.4	76.54	56.09
	9	281.02	159.5	115.1	73.61	60.18
	Average	299.78	156.38	108.8	78.29	55.96
	S.D	22.29	24.57	25.06	17.8	19.4
	Condition	TYI-S-33 + MTZ (584.24 mM)
	Minutes	15	60	120	180	240
	Concentration	mM	mM	mM	mM	mM
	Assays 1	494.27	132.62	92.89	69.52	53.17
	2	507.12	127.95	94.06	74.2	59.59
	3	480.25	131.45	95.23	74.2	60.76
	4	503.61	189.88	168.85	126.78	88.8
	5	497.77	234.28	160.67	119.77	88.22
	6	458.04	219.09	170.6	121.52	107.5
	7	472.07	141.39	125.61	85.3	74.78
	8	488.42	151.32	134.96	92.31	66.02
	9	486.09	173.52	143.72	100.49	63.1
	Average	487.52	166.83	131.84	96.01	73.55
	S.D	15.64	39.81	31.97	22.26	17.83
	Condition	PBS + MTZ (584.24 mM)
	Minutes	15	60	120	180	240
	Concentration	mM	mM	mM	mM	mM
	Assays 1	597.68	605.27	594.17	593.59	602.94
	2	600.01	611.12	614.62	597.68	602.94
	3	600.6	600.6	598.85	601.77	590.67
	4	601.18	578.4	590.67	590.08	598.85
	5	592.42	591.25	598.85	587.16	601.77
	6	578.98	600.01	585.41	590.08	601.18
	7	594.17	598.26	607.03	601.18	601.77
	8	594.76	563.76	602.35	602.35	593.59
	9	595.92	584.82	589.5	590.08	604.69
	Average	595.08	592.61	597.94	594.89	599.82
	S.D	6.77	14.79	9.2	5.93	4.69
